# Supplementary material for: Echocardiographic Assessment of Patients with Glycogen Storage Disease in a Single Center
Source: MDPI journal article supplement (doi:10.3390/ijerph20032191), 2023-01-25
Supplement: s1 [file s1]

**Supplementary Table S1.** Correlation analysis between the patients' characteristics and cardiac function.

| Variables  |         | Age    | BMI<br>z score | LV mass<br>z score | Uric acid | lactate | Total col | TG            | AST    | ALT    | CK     |
|------------|---------|--------|----------------|--------------------|-----------|---------|-----------|---------------|--------|--------|--------|
| EF         | r       | -0.175 | 0.065          | 0.221              | -0.116    | -0.105  | 0.085     | 0.163         | 0.394* | 0.471* | 0.284* |
|            | P value | 0.206  | 0.643          | 0.109              | 0.404     | 0.450   | 0.543     | 0.238         | 0.003  | 0.002  | 0.038  |
| FS         | r       | -0.138 | 0.072          | 0.243              | -0.088    | -0.080  | 0.120     | 0.181         | 0.441* | 0.445* | 0.265* |
|            | P value | 0.321  | 0.610          | 0.077              | 0.526     | 0.563   | 0.385     | 0.189         | 0.002  | <0.001 | 0.053  |
| E/A (z)    | r       | -0.171 | <b>-0.286*</b> | -0.162             | -0.153    | -0.081  | -0.149    | -0.246        | -0.116 | -0.131 | -0.142 |
|            | P value | 0.217  | <b>0.038</b>   | 0.242              | 0.271     | 0.560   | 0.283     | 0.073         | 0.403  | 0.346  | 0.306  |
| E/e' (z)   | r       | 0.249  | 0.226          | 0.109              | 0.214     | 0.237   | 0.106     | <b>0.286*</b> | 0.013  | 0.074  | -0.119 |
|            | P value | 0.072  | 0.108          | 0.439              | 0.124     | 0.087   | 0.451     | <b>0.038</b>  | 0.925  | 0.599  | 0.395  |
| RV S'(z)   | r       | 0.049  | 0.107          | 0.092              | 0.222     | 0.094   | 0.181     | 0.225         | 0.116  | 0.166  | 0.049  |
|            | P value | 0.727  | 0.447          | 0.510              | 0.107     | 0.499   | 0.190     | 0.102         | 0.404  | 0.231  | 0.725  |
| Strain (z) | r       | -0.208 | 0.032          | -0.279*            | -0.217    | -0.212  | -0.224    | -0.114        | 0.051  | 0.063  | -0.032 |
|            | P value | 0.132  | 0.821          | 0.041              | 0.116     | 0.123   | 0.103     | 0.410         | 0.715  | 0.652  | 0.818  |

AST, aspartate transaminase; ALT, alanine transaminase; BMI, body mass index; CK, creatinkinase; EF, ejection fraction; FS, fractional shortening; LV, left ventricle; LVPWd, left ventricular posterior wall thickness diameter; IVSd, interventricular septum diameter; TG, triglyceride; Total Col., total cholesterol; z, z-score
